# Supplementary material for: The Development of New Species-Specific Molecular Markers Based on 5S rDNA in Elaeagnus L. Species
Source: MDPI journal article supplement (doi:10.3390/plants10122713), 2021-12-10
Supplement: s1 [file s1]

**Table S13.** The studied plants of *Elaeagnus*, *Shepherdia* and *Hippophae* spp.

| Number | Species                       | Variety    | Code | Origin                                                          | Coordinates or greenhouse/dried material |
|--------|-------------------------------|------------|------|-----------------------------------------------------------------|------------------------------------------|
| 1      | <i>Elaeagnus angustifolia</i> |            |      | “Martin Sad” nursery, Mytisch, Russia                           | 55°41′49.65″<br>36°84′83.48″             |
| 2      |                               |            |      | Kerch', Crimea                                                  | 45°29′37.12″<br>36°42′86.36″             |
| 3      |                               |            |      | Near restaurant “Donskaya kuchnya” Rostovskaya oblast', Russia  | 47°18′63.27″<br>39°86′95.20″             |
| 4      |                               |            |      | Tikhoretsk, Krasnodar krai, Russia                              | 45°83′47.62″<br>40°11′28.65″             |
| 5      |                               |            |      | Hutor Millerov, Rostovskaya oblast', Russia                     | 47°61′80.54″<br>40°03′83.92″             |
| 6      |                               |            |      | Krasyukovskoe rural settlement, Rostovskaya oblast', Russia     | 47°61′77.66″<br>40°01′83.85″             |
| 7      |                               |            |      | Hutor Proletarka, Rostovskaya oblast', Russia                   | 47°87′99.94″<br>40°20′98.60″             |
| 8      |                               |            |      | Kamensky district, Rostovskaya oblast', Russia                  | 48°48′98.32″<br>40°34′47.70″             |
| 9      |                               |            |      | Hutor Diadin, Voronezhskaya oblast', Russia                     | 49°83′72.83″<br>40°52′72.58″             |
| 10     |                               |            |      | Boguchar, Voronezhskaya oblast', Russia                         | 49°91′91.82″<br>40°53′37.85″             |
| 11     | <i>Elaeagnus commutata</i>    |            |      | Street planting in “KIZ Allea”, Kievsky village, Moscow, Russia | 55°41′69.27″<br>36°84′76.71″             |
| 12     |                               |            |      | Yard of School 2044, Moscow, Russia                             | 55°92′63.12″<br>37°54′25.41″             |
| 13     |                               |            |      | Yard of house 165D4, Dmitrovskoe shosse, Moscow, Russia         | 55°92′22.91″<br>37°54′27.00″             |
| 14     | <i>Elaeagnus pungens</i>      | “Maculata” |      | “Opt-khoz” nursery, Ozery,                                      | greenhouse                               |

|    |                              |                          |                         |                                                               |                              |
|----|------------------------------|--------------------------|-------------------------|---------------------------------------------------------------|------------------------------|
|    |                              |                          |                         | Russia                                                        |                              |
| 15 | <i>Elaeagnus × ebbingei</i>  | “Compacta”               |                         | “Opt-khoz” nursery, Ozery, Russia                             | 55°92′59.63”<br>37°55′03.87” |
| 16 |                              | “Lime light”             |                         | “Opt-khoz” nursery, Ozery, Russia                             | 55°41′48.64”<br>36°84′81.86” |
| 17 |                              | “Gilt Edge”              |                         | “Opt-khoz” nursery, Ozery, Russia                             | 55°41′48.69”<br>36°84′82.02” |
| 18 | <i>Elaeagnus multiflora</i>  |                          |                         | “Nara-Sad” nursery, Naro-Fominsk, Russia                      | 55°41′48.48”<br>36°84′79.92” |
| 19 | <i>Elaeagnus umbellata</i>   | “Pointilla Sweet’n’Sour” |                         | “Darvin” nursery, Moscow, Russia                              | 55°41′48.64”<br>36°84′85.38” |
| 20 |                              | “Pointilla Fortunella”   |                         | “Martin Sad” nursery, Mytisch, Russia                         | 55°41′48.35”<br>36°84′84.98” |
| 21 |                              | “Pointilla Amoroso”      |                         | “Martin Sad” nursery, Mytisch, Russia                         | 55°41′49.19”<br>36°84′83.52” |
| 22 | <i>Shepherdia argentea</i>   |                          | Sharg (AA#102-77*A)     | Arnold Arboretum, The Harvard University, USA                 | dried material               |
| 23 | <i>Shepherdia canadensis</i> |                          | Shcan (*19801643-134ZZ) | Botanic Garden Meise, Nieuwelaan, 38, 1860 Meise, Belgium     | dried material               |
| 24 | <i>Hippophae rhamnoides</i>  |                          |                         | Jardin botanique de Lyon, France                              | dried material               |
| 25 | <i>Hippophae salicifolia</i> |                          |                         | Rogów Arboretum of Warsaw University of Life Sciences, Poland | dried material               |
